# Supplementary material for: Apoptotic endothelial cells release small extracellular vesicles loaded with immunostimulatory viral-like RNAs
Source: PubMed Central journal article supplement (PMC6510763; doi:10.1038/s41598-019-43591-y), 2019-05-10
Supplement: 41598_2019_43591_MOESM1_ESM.pdf [file 41598_2019_43591_MOESM1_ESM.pdf]

## Supplementary information

### **Apoptotic endothelial cells release small extracellular vesicles loaded with immunostimulatory viral-like RNAs**

Marie-Pierre Hardy<sup>1,2</sup>, Éric Audemard<sup>1</sup>, Francis Migneault<sup>2,3</sup>, Albert Feghaly<sup>1</sup>, Sylvie Brochu<sup>1,2</sup>, Patrick Gendron<sup>1</sup>, Éric Boilard<sup>2,4</sup>, François Major<sup>1,5,6</sup>, Mélanie Dieudé<sup>2,3</sup>, Marie-Josée Hébert<sup>2,3,7</sup>, Claude Perreault<sup>1,2,7\*</sup>.

<sup>1</sup>Institute for Research in Immunology and Cancer, Université de Montréal, Montreal, QC, Canada, H3C 3J7.

<sup>2</sup>Canadian National Transplant Research Program, Edmonton, Alberta, Canada, T6G 2E1.

<sup>3</sup>Research Centre, Centre Hospitalier de l'Université de Montréal (CRCHUM), Montreal, QC, Canada, H2X 0A9.

<sup>4</sup>Centre de Recherche du Centre Hospitalier Universitaire de Québec, Faculté de Médecine de l'Université Laval, Québec, Québec, Canada

<sup>5</sup>Department of Computer Science and Operations Research, Université de Montréal, Montreal, QC, Canada, H3C 3J7.

<sup>6</sup>Department of Biochemistry, Faculty of Medicine, Université de Montréal, Montreal, QC, Canada, H3C 3J7.

<sup>7</sup>Department of Medicine, Université de Montréal, Montreal, QC, Canada, H3C 3J7.

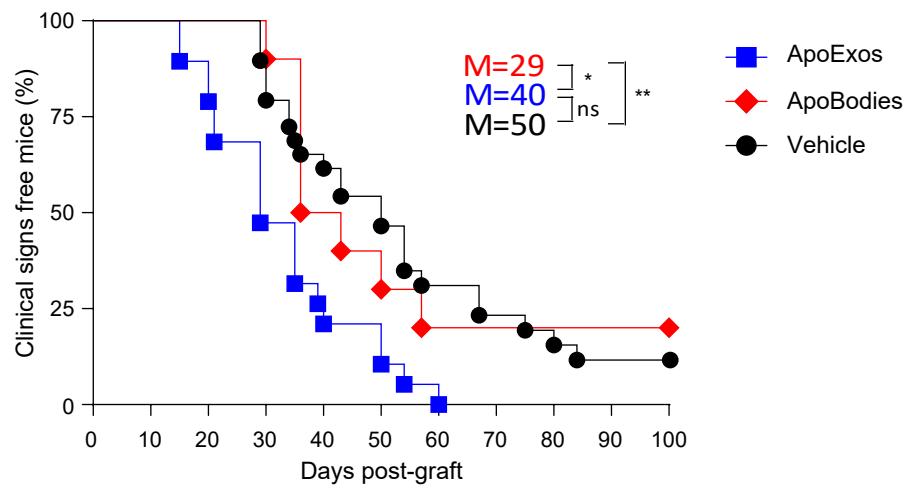

**Supplemental figure 1. ApoExos increase GVHD severity.** Lethally-irradiated (950cGy) recipient B6.129F1 mice were grafted with  $10 \times 10^6$  bone marrow cells and  $60 \times 10^6$  of a mix of spleen and lymph node cells from B6.SJL. Purified ApoExos (solid blue line) or ApoBodies (solid red line) collected from 0.45ml of serum-starved murine C57BL/6 endothelial cells supernatant (Dieudé M. *et al*; Science Translational Medicine; 2015 Dec 16; 7(318):318ra200) or equal volume of PBS (solid black line) were iv injected on day 0,+2,+4,+6 and +8 post-graft. GVHD clinical signs (weight loss, fur texture, posture, activity and skin integrity) were then monitored overtime until day +100 using GVHD score as a metrics (Cooke K.R. *et al*; Blood; 1996 Oct 15; 88(8):3230-9). M represents the median of GVHD signs (GVHD score  $\geq 2$ ) appearance time. The log-rank test was used to compare the time of GVHD clinical signs appearance between the 3 groups. ApoExos: n=19, ApoBodies: n=10, PBS: n=30. \* $p \leq 0,05$ ; \*\*  $p \leq 0,01$ .

a

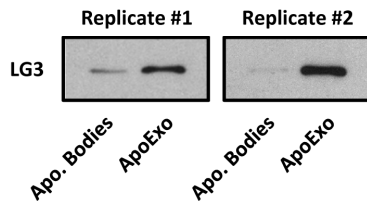

b

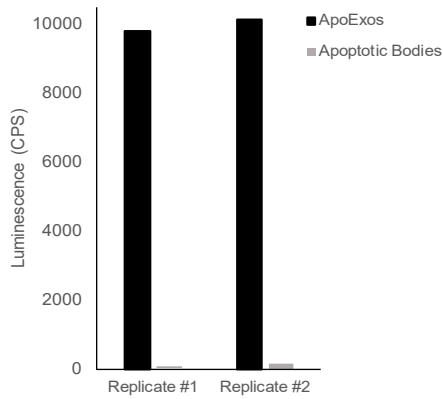

**Supplemental figure 2. HUVECs-derived ApoExos contain elevated levels of LG3 and high caspase-like proteasome activity.** (a) Immunoblot of LG3 in ApoExos or apoptotic bodies purified from the 2 replicates of serum-starved apoptotic HUVECs used for transcriptomic analyses. The antibody used for Western blotting was an anti-perlecan from Santa Cruz Biotechnology. (b) Quantification of proteasome caspase-like proteolytic activity in ApoExos (black bars) and apoptotic bodies (grey bars) purified from the 2 replicates of serum-starved apoptotic HUVECs used for transcriptomic analyses. The assay was performed in white 96-well plates using the Proteasome-Glo Cell-Based Assay (Promega) according to the manufacturer's instructions using ApoExos (0.4  $\mu$ g) or apoptotic bodies (0.4  $\mu$ g) from serum-starved HUVECs supernatant. Luminescence was measured using a PerkinElmer Victor 3 V 1420 Multilabel Counter 1420-040 Microplate Reader.

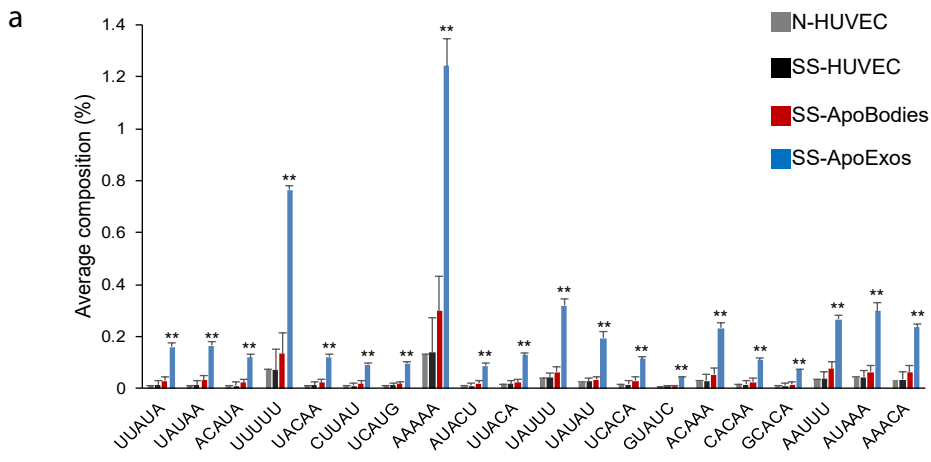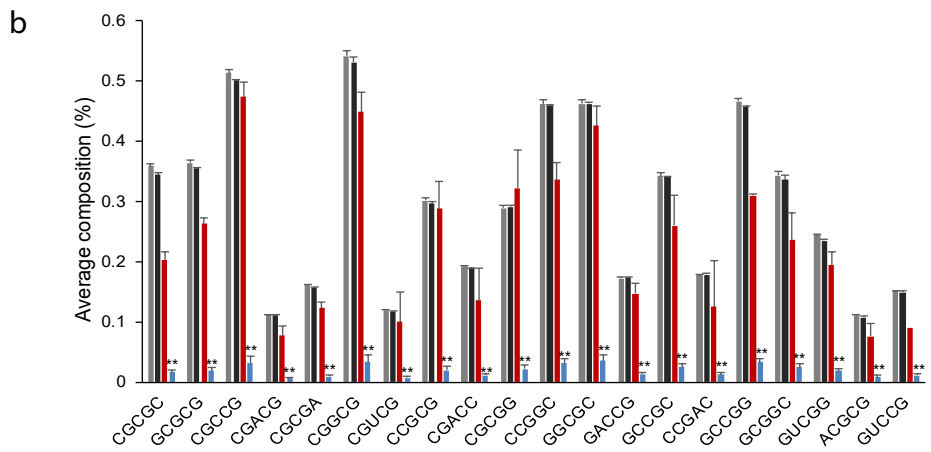

**Supplemental figure 3. HUVECs-derived ApoExos RNAs contain more A and/or U-rich and less G and/or C-rich 5nt motifs.** Whole RNA sequencing adaptor-trimmed reads with good quality were chopped in 5nt-long k-mers which were then quantified using JellyFish. (a) Bar chart showing ApoExos top enriched motifs. (b) Bar chart showing ApoExos most repressed motifs. (Two-tailed unpaired T tests, \* $p \leq 0.05$ , \*\* $p \leq 0.01$ ,  $n=2$ ).

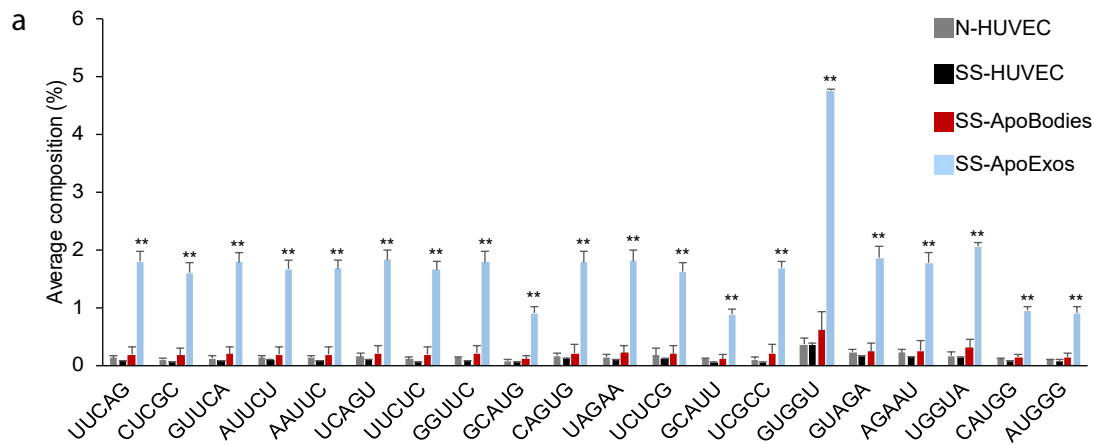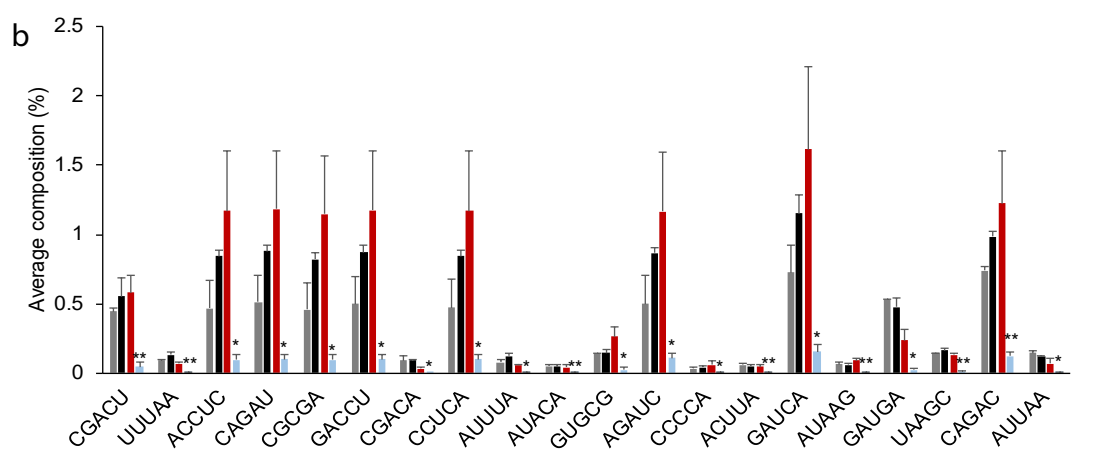

**Supplemental figure 4. HUVECs-derived ApoExos small RNAs contain more G and/or U-rich and less A and/or C-rich 5-nt motifs.** Small RNA sequencing adaptor-trimmed reads with good quality were chopped in 5nt-long k-mers which were then quantified using JellyFish. (a) Bar chart showing ApoExos top enriched motifs. (b) Bar chart showing ApoExos most repressed motifs. (Two-tailed unpaired T tests, \* $p \leq 0.05$ , \*\* $p \leq 0.01$ ,  $n=2$ ).

| <b>RNA family or feature enriched in ApoExos</b>                                 | <b>PRR(s) stimulation</b> | <b>Involvement in immune response</b>                             | <b>References</b> |
|----------------------------------------------------------------------------------|---------------------------|-------------------------------------------------------------------|-------------------|
| U1 snRNA                                                                         | TLR3, TLR7, TLR8, RIG-I   | Triggers production of autoantibodies against snRNP               | 30-33             |
| miRNAs                                                                           | TLR7, TLR8                |                                                                   | 28, 67            |
| mt-tRNAs                                                                         | PKR                       |                                                                   | 29                |
| Y RNAs                                                                           | TLR3, TLR7                | Trigger production of autoantibodies against Ro60                 | 64-65             |
| EREs (LINE, SINE, LTR)                                                           | TLR3, RIG-I, MDA5         | Trigger IFN signaling, enhance the immunogenicity of cancer cells | 20, 23, 35-40, 61 |
| 5'PPP motif<br>(RNA polymerase III transcripts (ex. vault RNAs, RN7SL1/2, EREs)) | RIG-I                     |                                                                   | 20, 66            |
| dsRNAs (ex. LTRs, inverted Alu-Alu duplexes)                                     | TLR3, MDA5                | Promote autoimmunity (Aicardi-Gouttières syndrome)                | 23, 35-40, 44     |
| U-rich, AU-rich and GU-rich sequences                                            | TLR7 and/or TLR8          |                                                                   | 46-50, 52, 67     |
| Linear RNA structures                                                            | TLR7, TLR8                |                                                                   | 52, 68            |

**Supplemental Table I. Immunostimulatory attributes of ApoExos-enriched RNAs.** miRNA: microRNA, mt-tRNA: mitochondrial transfer RNA, snRNA: small nuclear RNA, srpRNA: signal recognition particle RNA, ERE: endogenous retroelements.
